# Supplementary material for: Metabolomic Pathways Predicting Labor Dystocia by Maternal Body Mass Index
Source: PubMed Central journal article supplement — AJP Rep. 2020 Mar 4;10(1):e68–77. doi: 10.1055/s-0040-1702928 (PMC7056397; doi:10.1055/s-0040-1702928), 2020-03-04
Supplement: 10-1055-s-0040-1702928-s190067.pdf [file 10-1055-s-0040-1702928-s190067.pdf]

**Supplementary Table 1** Statistical strategies for variables related to labor dystocia

| Variable                                   | Relationship to labor dystocia                      | Statistical strategy                                                            |
|--------------------------------------------|-----------------------------------------------------|---------------------------------------------------------------------------------|
| Third trimester serum metabolomics profile | Predictor                                           | Predictor                                                                       |
| Labor dystocia                             | Outcome                                             | Outcome                                                                         |
| Maternal BMI at hospital admission         | Predictor (alters metabolic pathways)               | Within-group analysis<br>Covariate in metabolomics analyses                     |
| Maternal age                               | Independent risk factor (alters metabolic pathways) | Case-control design with balanced groups and covariate in metabolomics analyses |
| Parity                                     | Independent risk factor                             | Case-control design with balanced groups                                        |
| Gestational age at labor onset             | Independent risk factor                             | Case-control design with balanced groups                                        |
| Gestational weight gain                    | Independent risk factor                             | Incorporated in BMI at hospital admission (covariate in analyses)               |
| Gestational diabetes                       | Independent risk factor                             | Sample exclusion                                                                |
| Mode of labor onset                        | Independent risk factor                             | Case-control design with balanced groups                                        |
| Fetus size                                 | Independent risk factor                             | Case-control design with balanced groups                                        |
| Chorioamnionitis                           | Intrapartum characteristic                          | Not controlled—within intrapartum causal pathway                                |
| Epidural anesthesia                        | Intrapartum characteristic                          | Not controlled—within intrapartum causal pathway                                |
| Malposition of fetal vertex                | Intrapartum characteristic                          | Not controlled—within intrapartum causal pathway                                |
| Synthetic oxytocin augmentation of labor   | Intrapartum characteristic                          | Not controlled—within intrapartum causal pathway                                |

Abbreviation: BMI, body mass index.
